# Supplementary material for: Age-Period-Cohort Analysis of HIV Mortality in China: Data from the Global Burden of Disease Study 2016
Source: PubMed Central journal article supplement (PMC7184615; doi:10.1038/s41598-020-63141-1), 2020-04-27
Supplement: 41598_2020_63141_MOESM1_ESM.pdf [file 41598_2020_63141_MOESM1_ESM.pdf]

**Age-Period-Cohort Analysis of HIV Mortality in China:  
Data from the Global Burden of Disease Study 2016**

Disi Gao<sup>†1</sup>, Zhiyong Zou<sup>†1</sup>, Wenjing Zhang<sup>1</sup>, Tianqi Chen<sup>1</sup>, Wenxin  
Cui<sup>1</sup>, Yinghua Ma<sup>1\*</sup>



| Median<br>Period | Age group |       |       |       |       |       |       |       |       |       |       |       | Median<br>Birth Cohort |       |
|------------------|-----------|-------|-------|-------|-------|-------|-------|-------|-------|-------|-------|-------|------------------------|-------|
|                  | 15-19     | 20-24 | 25-29 | 30-34 | 35-39 | 40-44 | 45-49 | 50-54 | 55-59 | 60-64 | 65-69 | 70-74 |                        | 75-79 |
| Female           |           |       |       |       |       |       |       |       |       |       |       |       | 0.254                  | 1917  |
|                  |           |       |       |       |       |       |       |       |       |       |       | 0.265 | 0.356                  | 1922  |
|                  |           |       |       |       |       |       |       |       |       |       | 0.377 | 0.410 | 0.711                  | 1927  |
|                  |           |       |       |       |       |       |       |       |       | 0.390 | 0.551 | 0.845 | 0.766                  | 1932  |
|                  |           |       |       |       |       |       |       |       | 0.375 | 0.571 | 1.116 | 0.918 | 0.724                  | 1937  |
|                  |           |       |       |       |       |       |       | 0.407 | 0.577 | 1.189 | 1.222 | 0.951 |                        | 1942  |
|                  |           |       |       |       |       |       | 0.456 | 0.632 | 1.225 | 1.231 | 1.246 |       |                        | 1947  |
|                  |           |       |       |       |       | 0.361 | 0.659 | 1.283 | 1.254 | 1.125 |       |       |                        | 1952  |
|                  |           |       |       |       | 0.347 | 0.546 | 1.316 | 1.297 | 0.991 |       |       |       |                        | 1957  |
|                  |           |       |       | 0.299 | 0.554 | 1.326 | 1.429 | 1.153 |       |       |       |       |                        | 1962  |
|                  |           |       | 0.185 | 0.454 | 1.238 | 1.474 | 1.337 |       |       |       |       |       |                        | 1967  |
|                  |           | 0.072 | 0.289 | 1.009 | 1.382 | 1.404 |       |       |       |       |       |       |                        | 1972  |
|                  | 0.017     | 0.121 | 0.719 | 1.196 | 1.410 |       |       |       |       |       |       |       |                        | 1977  |
| 1994             | 0.032     | 0.363 | 1.002 | 1.518 |       |       |       |       |       |       |       |       |                        | 1982  |
| 1999             | 0.106     | 0.458 | 1.061 |       |       |       |       |       |       |       |       |       |                        | 1987  |
| 2004             | 0.130     | 0.392 |       |       |       |       |       |       |       |       |       |       |                        | 1992  |
| 2009             | 0.146     |       |       |       |       |       |       |       |       |       |       |       |                        |       |
| 2014             |           |       |       |       |       |       |       |       |       |       |       |       |                        |       |

The cohort follows from lower left to upper right, going diagonally. See S2 table for numbers of HIV/AIDS death for each of age-period cross classification. All data were

obtained from the GBD Results Tools (<http://ghdx.healthdata.org/gbd-2016>)
