# Supplementary material for: Age-Period-Cohort Analysis of HIV Mortality in China: Data from the Global Burden of Disease Study 2016
Source: PubMed Central journal article supplement (PMC7184615; doi:10.1038/s41598-020-63141-1), 2020-04-27
Supplement: 41598_2020_63141_MOESM2_ESM.pdf [file 41598_2020_63141_MOESM2_ESM.pdf]

**Age-Period-Cohort Analysis of HIV Mortality in China:  
Data from the Global Burden of Disease Study 2016**

Disi Gao<sup>†1</sup>, Zhiyong Zou<sup>†1</sup>, Wenjing Zhang<sup>1</sup>, Tianqi Chen<sup>1</sup>, Wenxin  
Cui<sup>1</sup>, Yinghua Ma<sup>1\*</sup>



| Median<br>Period | Age group |       |       |       |       |       |       |       |       |       |       |       | Median<br>Birth Cohort |       |
|------------------|-----------|-------|-------|-------|-------|-------|-------|-------|-------|-------|-------|-------|------------------------|-------|
|                  | 15-19     | 20-24 | 25-29 | 30-34 | 35-39 | 40-44 | 45-49 | 50-54 | 55-59 | 60-64 | 65-69 | 70-74 |                        | 75-79 |
| Female           |           |       |       |       |       |       |       |       |       |       |       |       | 469                    | 1917  |
|                  |           |       |       |       |       |       |       |       |       |       |       | 713   | 700                    | 1922  |
|                  |           |       |       |       |       |       |       |       |       |       | 1370  | 1181  | 1679                   | 1927  |
|                  |           |       |       |       |       |       |       |       |       | 1776  | 2170  | 3013  | 2124                   | 1932  |
|                  |           |       |       |       |       |       |       |       | 1936  | 2736  | 4986  | 3558  | 2261                   | 1937  |
|                  |           |       |       |       |       |       |       | 2420  | 3092  | 6218  | 5808  | 3972  |                        | 1942  |
|                  |           |       |       |       |       |       | 3635  | 4202  | 8672  | 7939  | 7578  |       |                        | 1947  |
|                  |           |       |       |       |       | 3588  | 6055  | 12567 | 11677 | 10338 |       |       |                        | 1952  |
|                  |           |       |       |       | 3823  | 5781  | 13690 | 13131 | 9809  |       |       |       |                        | 1957  |
|                  |           |       |       | 3875  | 6427  | 16264 | 16809 | 13502 |       |       |       |       |                        | 1962  |
|                  |           |       | 2799  | 6524  | 18652 | 21612 | 19782 |       |       |       |       |       |                        | 1967  |
|                  |           | 1046  | 4448  | 15023 | 20777 | 21002 |       |       |       |       |       |       |                        | 1972  |
|                  | ↗         | 207   | 1611  | 8879  | 15083 | 17322 |       |       |       |       |       |       |                        | 1977  |
| 1994             | ↗         | 394   | 4476  | 12067 | 18066 |       |       |       |       |       |       |       |                        | 1982  |
| 1999             | ↗         | 1581  | 6752  | 15869 |       |       |       |       |       |       |       |       |                        | 1987  |
| 2004             | ↗         | 1768  | 5277  |       |       |       |       |       |       |       |       |       |                        | 1992  |
| 2009             | ↗         | 1444  |       |       |       |       |       |       |       |       |       |       |                        |       |
| 2014             |           |       |       |       |       |       |       |       |       |       |       |       |                        |       |

The cohort follows from lower left to upper right, going diagonally.
